# Supplementary material for: Biomolecular strategy for designing antibiotic–silver nanoparticles conjugate via nitrate reductase mediated β-lactamase inhibition with molecular docking insights
Source: Research Square preprint supplement (doi:10.21203/rs.3.rs-7042236/v1), 2025-07-16
Supplement: Supplementary file 1 [file 11da9ee9374ee24dbf73fe19.pdf]

# Biomolecular strategy for designing antibiotic–silver nanoparticles conjugate via nitrate reductase mediated $\beta$ -lactamase inhibition with molecular docking insights

Gerges Gad Faheem<sup>1</sup>, Bahig A. El Deeb<sup>1,\*</sup>, Mohamed Ismeal<sup>2</sup> & Mahmoud S. Bakhit<sup>1</sup>

<sup>1</sup>Department of Botany and Microbiology, Faculty of Science, Sohag University, Sohag, 82524, Egypt

<sup>2</sup>Department of Chemistry, Faculty of Science, Sohag University, Sohag, 82524, Egypt

\*email: [beldeep@science.sohag.edu.eg](mailto:beldeep@science.sohag.edu.eg)

## Supplementary

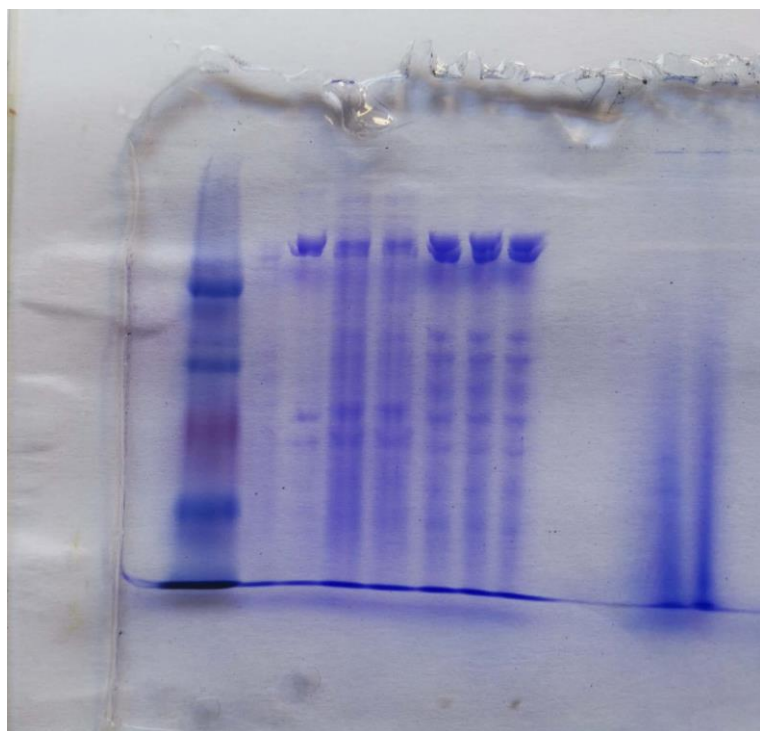

**Supplemental Figure S1.** Full SDS-PAGE gel image showing protein profiles in the *Talaromyces funiculosus* filtrate and the synthesized AgNPs.
